# Supplementary material
Source: PubMed Central journal article supplement (PMC3443490)
Supplement: NIHMS315558-supplement-2.pdf [file NIHMS315558-supplement-2.pdf]

**SUPPLEMENTAL INFORMATION**

**SUMO1-dependent modulation of SERCA2a in heart failure**

**Changwon Kho<sup>1\*</sup>, Ahyoung Lee<sup>1\*</sup>, Dongtak Jeong<sup>1</sup>, Jae Gyun Oh<sup>2</sup>, Antoine H. Chaanine<sup>1</sup>, Eddy Kizana<sup>3</sup>, Woo Jin Park<sup>2</sup>, and Roger J. Hajjar<sup>1\*\*</sup>**

<sup>1</sup>Cardiovascular Research Center, Mount Sinai School of Medicine, New York, NY10029, USA.

<sup>2</sup>College of Life Sciences, Gwangju Institute of Science and Technology, Gwangju, South Korea.

<sup>3</sup>Westmead Clinical School, The University of Sydney, Sydney, Australia.

\* These authors contributed equally to this work.

\*\* Corresponding author; Roger J. Hajjar, MD.

**[Supplemental information included Eleven figures and Nine tables.]**

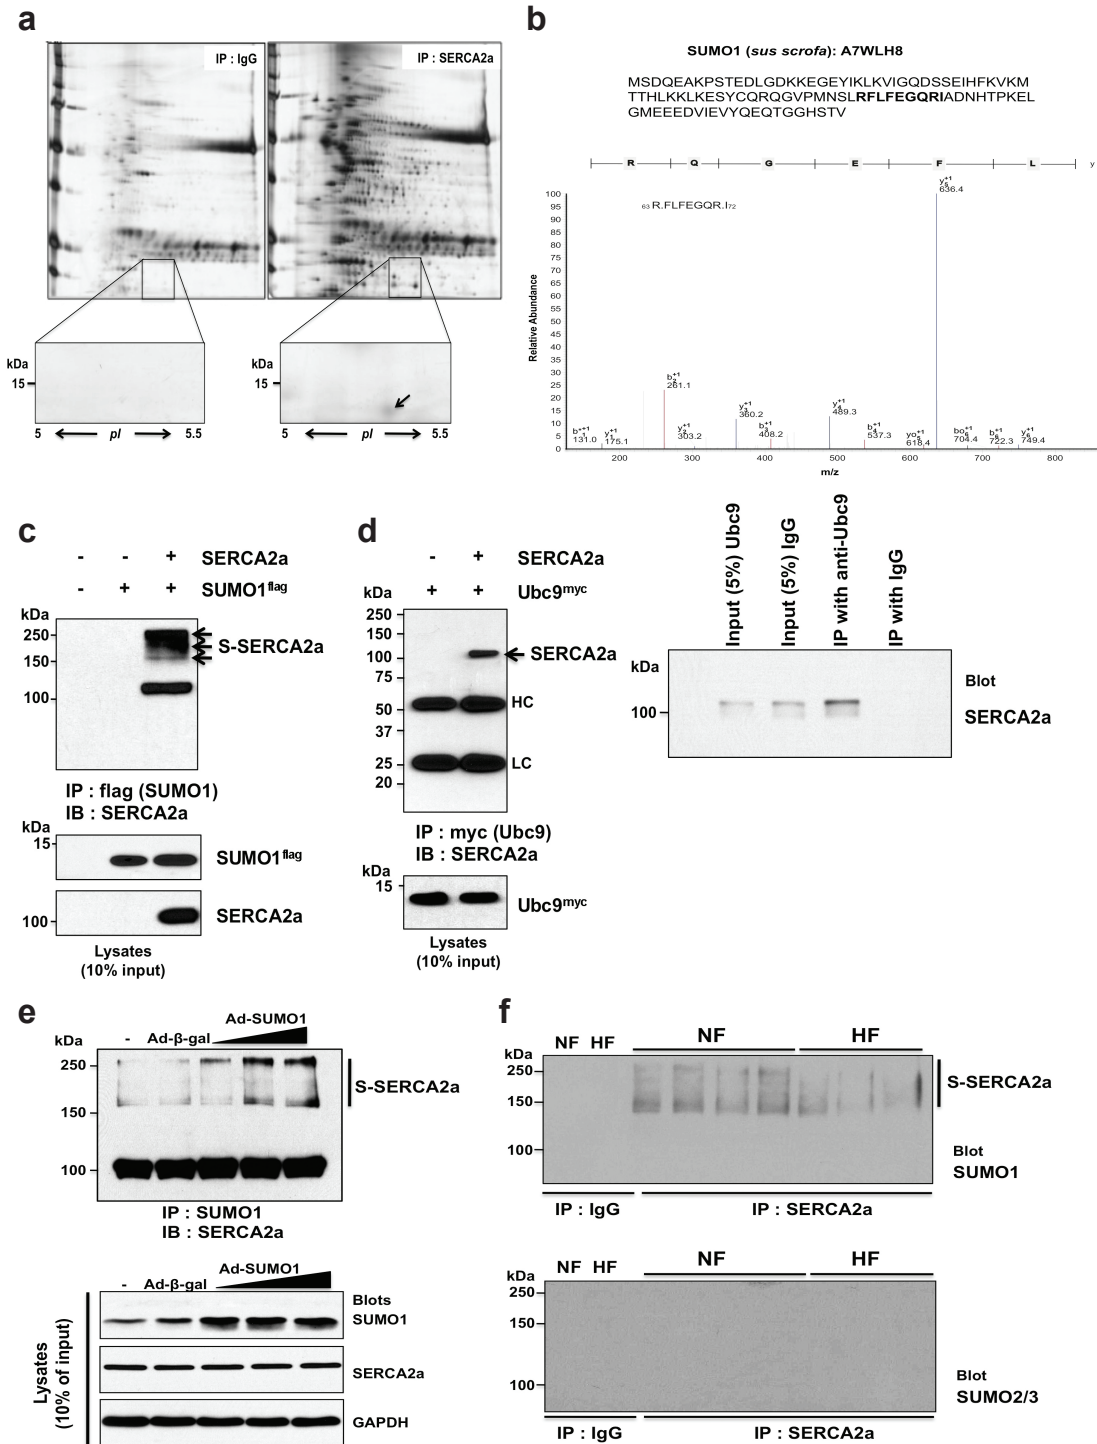

### Supplementary Figure 1. SERCA2a complex analysis.

(a) Two-dimensional SDS-PAGE gels of SERCA2a complexes. A silver-stained SDS-PAGE gel is shown, which reveals a 12 kDa spot (arrow) that immunoprecipitated with SERCA2a. SERCA2a enrichment was confirmed by blotting the immunoprecipitated

SERCA2a complexes with a rabbit anti-SERCA2a antibody (anti-S2a). Rabbit IgG (anti-IgG) was used as a negative control.

**(b)** The representative peptide fingerprint for SUMO1 was identified by tandem mass spectrometric analysis. The protein sequence of SUMO1 is shown with the matched peptide highlighted in bold.

**(c)** *in vivo* SERCA2a SUMOylation in HEK293 cells expressing flag-tagged SUMO1. Precipitated flag-tagged SUMO1 conjugates were analyzed using an anti-SERCA2a antibody.

**(d)** Direct interaction between SERCA2a and Ubc9 (left panel). HEK293 cells were transfected with expression vectors for myc-tagged Ubc9 and SERCA2a or a pcDNA vector (negative control). Cell lysates were subjected to immunoprecipitation (IP) with an anti-myc antibody, and the resulting precipitates were immunoblotted with anti-SERCA2a. HC, heavy chain; LC, light chain. Endogenous interaction between SERCA2a and Ubc9 in isolated adult mouse cardiomyocytes (right). Immunoprecipitation using cardiomyocyte lysates showing Ubc9 and SERCA2a interact *in vivo*.

**(e)** *in vivo* SERCA2a SUMOylation in isolated adult mouse cardiomyocytes infected with adenovirus expressing SUMO1. Immunoblot analysis showed that SUMO1 has a dose-dependent affect on SERCA2a SUMOylation in cardiomyocytes.

**(f)** SUMOylated SERCA2a in human patient. Reverse IP experiments on SERCA2a SUMOylation *in vivo* was performed on same human patient as shown in Figure 1. IP was performed with anti-SERCA2a antibody and the SUMO1 conjugations were revealed by anti-SUMO1 (top panel). The same blot was stripped and re-probed with anti-SUMO2/3 (bottom panel).

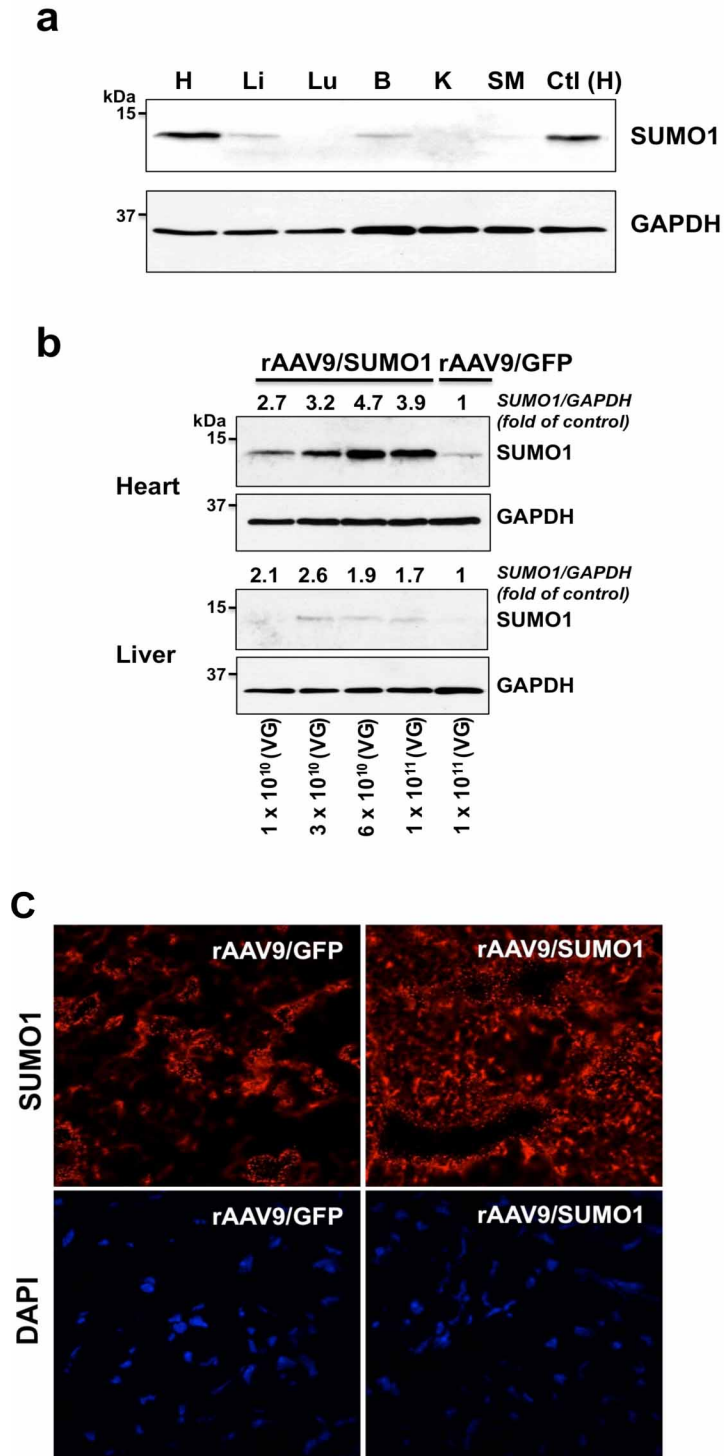

**Supplementary Figure 2. Distribution of SUMO1 expression after tail-vein injection.**

(a) Immunoblotting for SUMO1 expression. 4 weeks after tail-vein injection of either rAAV9/SUMO1 or rAAV9/GFP, indicated mice tissues were harvested and subjected to immunoblotting to detect SUMO1 expression. H: Heart; Li: Liver; Lu: Lung; B: Brain; K: Kidney; SM: Smooth muscle; Ctl: heart of rAAV9/GFP injected mice.

**(b)** Animals were injected by rAAV9/SUMO1 in a different amount of viral genomes (VG). Heart and liver tissues were then analyzed by immunoblotting to detect expression of SUMO1 transduction. GAPDH expression was examined for normalization purposes.

**(c)** At 4 weeks after SUMO1 gene delivery, optical section images collected from cardiac tissues were double stained for SUMO1 (red) and DAPI (DNA, blue). rAAV9/GFP injected heart used as a control.

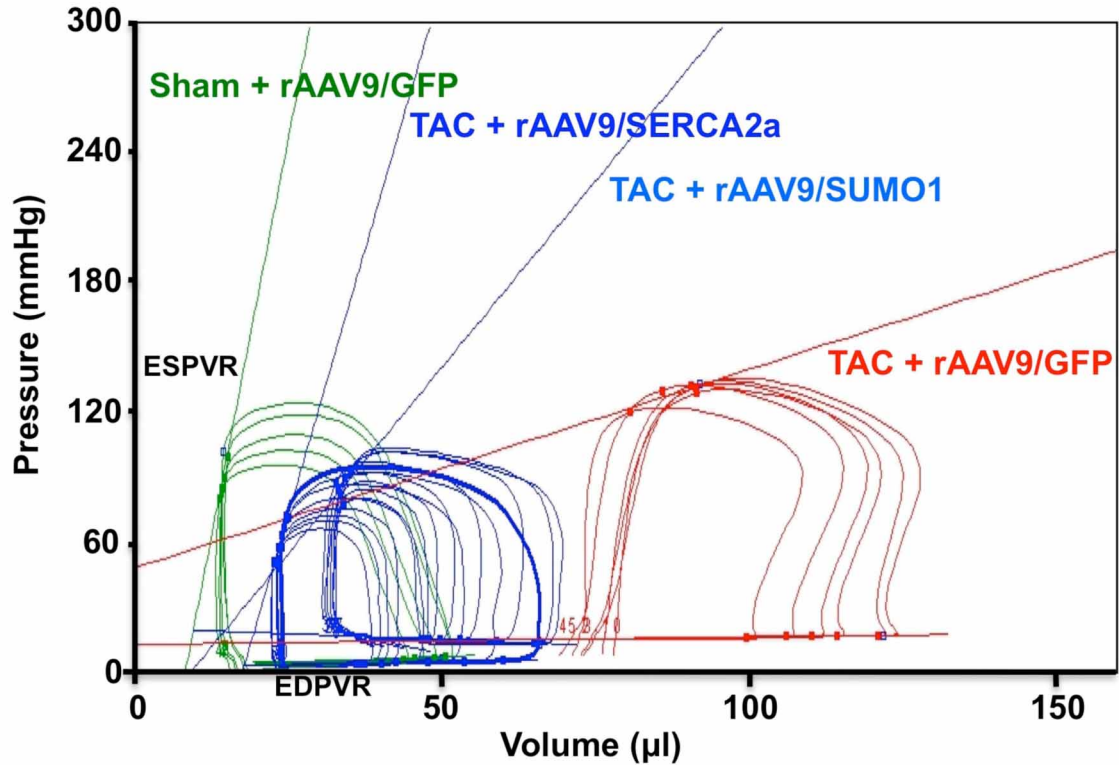

**Supplementary Figure 3. Hemodynamic analyses of SUMO1 gene delivered mouse.** Representative pressure volume loops at 2 months after adeno-associated virus encoding SUMO1 (rAAV9/SUMO1) delivery (4 months after TAC operation). After induction of HF, the loops shifted rightward. The end-systolic pressure-volume relationship (ESPVR) in the LV was slightly steeper in rAAV9/SUMO1 treated animals than in rAAV9/GFP treated controls, suggesting increased cardiac contractility. Sham + rAAV9/GFP: green; TAC + rAAV9/SUMO1: light blue; TAC + rAAV9/SERCA2a: blue; TAC + rAAV9/GFP: red.

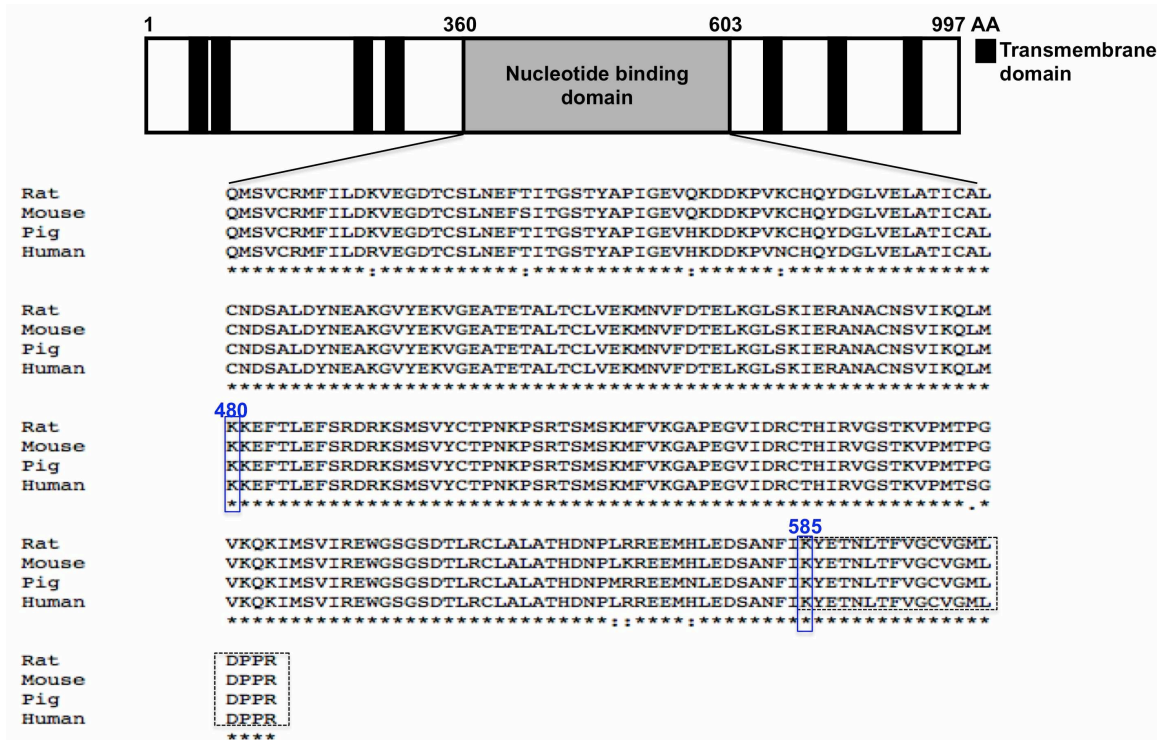

#### Supplementary Figure 4. N-terminal domain of SERCA2a.

The protein sequences of human (AC# P16615-2), pig (AC# P11607-2), rat (AC# P11507-2) and mouse (AC# O55143-2) SERCA2a were aligned. Putative SUMO consensus motifs ( $\psi$ KXE, where  $\psi$  is a hydrophobic amino acid) were detected at lysine 480 and lysine 585. The SUMO modification sites of SERCA2a are outlined in black. Hydrolase domains are outlined by a dotted line.

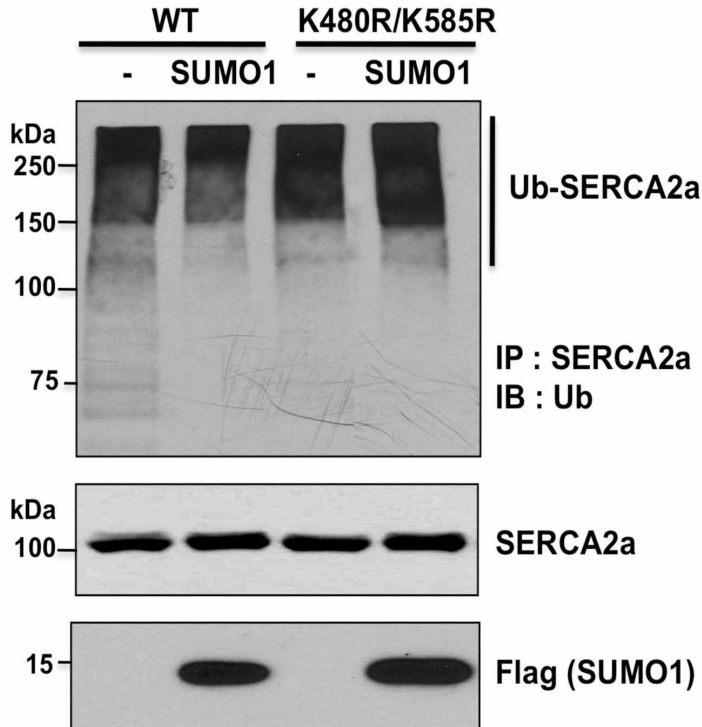

**Supplementary Figure 5. Ubiquitination of SERCA2a.**

HEK cells transfected with SERCA2a (WT or K480R/K585R) alone or together with flag-tagged SUMO1. 48 hours after transfection, cells were treated with 20  $\mu$ M MG132 (proteasome inhibitor) for 3 hours. Cells were lysed in with lysis buffer (10 mM Tris-HCl, pH 7.5, 10 mM NaCl, 0.5% NP-40, 5 mM EDTA, 5 mM EGTA plus 20 mM NEM, 200  $\mu$ M iodoacetamide, 1 mM sodium orthovanadate and 1 complete EDTA-free cocktail tablet (Roche Molecular Biochemicals). After centrifugation at 13,000 g for 10 minutes, supernatants were subjected to immunoprecipitation with anti-SERCA2a antibody. The ubiquitin conjugated SERCA2a were analyzed by anti-Ubiquitin antibody.



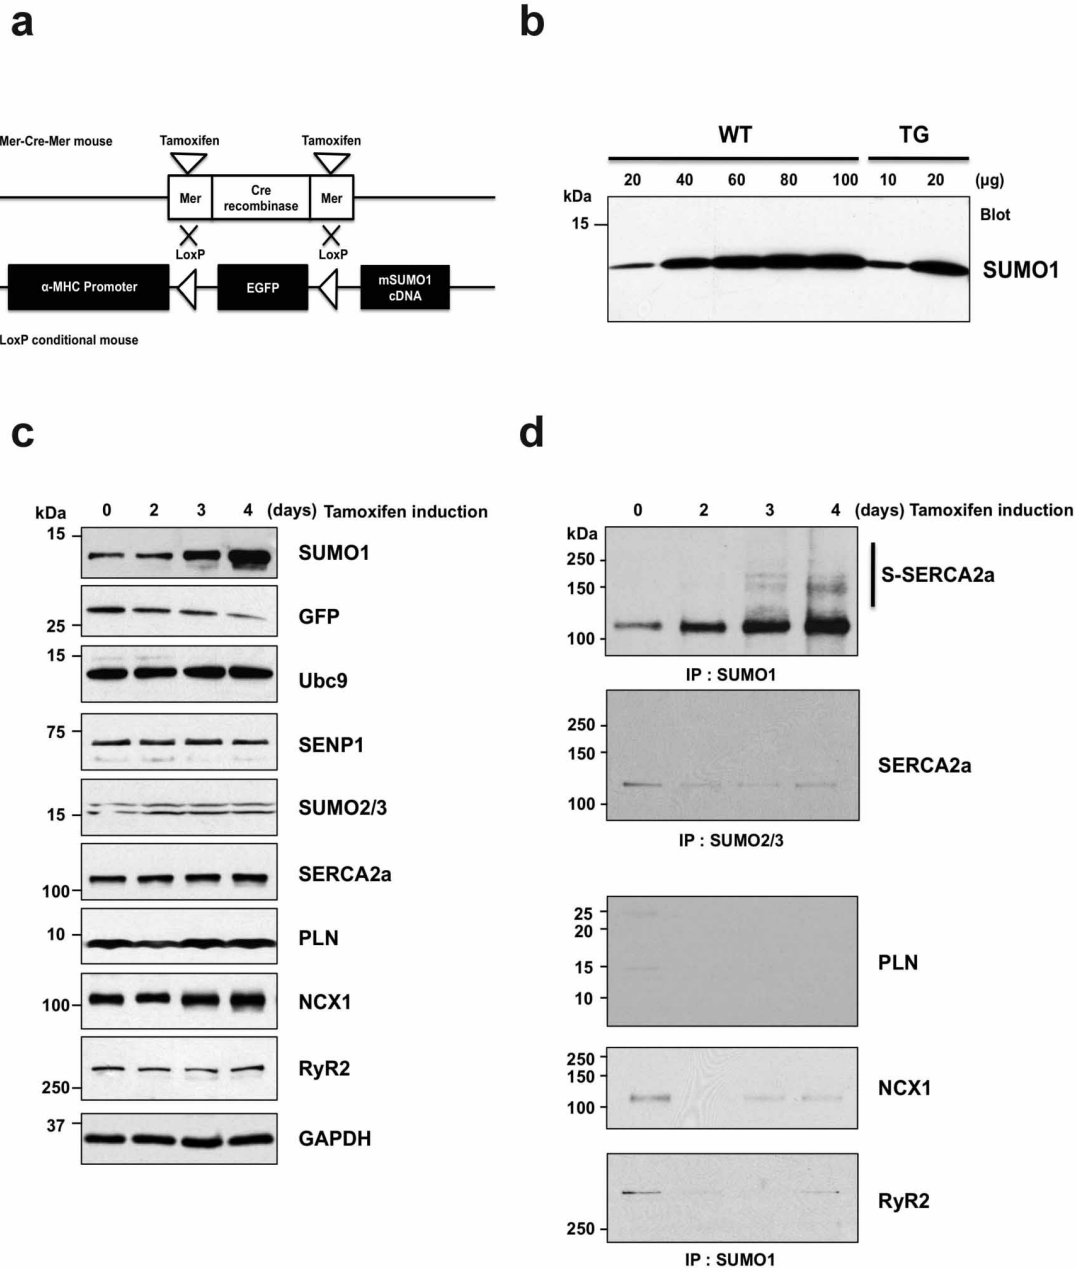

**Supplementary Figure 6. Effects of tamoxifen-induced SUMO1 overexpression on  $\text{Ca}^{2+}$  regulatory proteins in transgenic mice.**

(a) Generation of conditional SUMO1 transgenic mice. Cre/loxP conditional expression system was utilized in which administration of tamoxifen induced heart-specific SUMO1 overexpression and concomitantly inhibited EGFP expression. Cardiac SUMO1 is expressed under the control of the  $\alpha$ -MHC promoter.

(b) Immunoblot analysis revealed that the levels of tamoxifen-induced SUMO1 expression in the transgenic mice were approximately 5-fold higher than that of wild-type littermates. WT: wild-type littermates; TG: SUMO1 transgenic mice.

(c) Representative immunoblots show alternations of cardiac protein expressions in SUMO1 transgenic mice treated with tamoxifen received in a different duration as indicated.

(d) Effect of tamoxifen-induced SUMO1 overexpression on SUMOylations of SERCA2a. Cardiac tissues were immunoprecipitated with anti-SUMO antibodies. SUMOylated forms of SERCA2a were detected by immunoblot analysis using an anti-SERCA2a antibody. S-SERCA2a: SUMOylated SERCA2a.

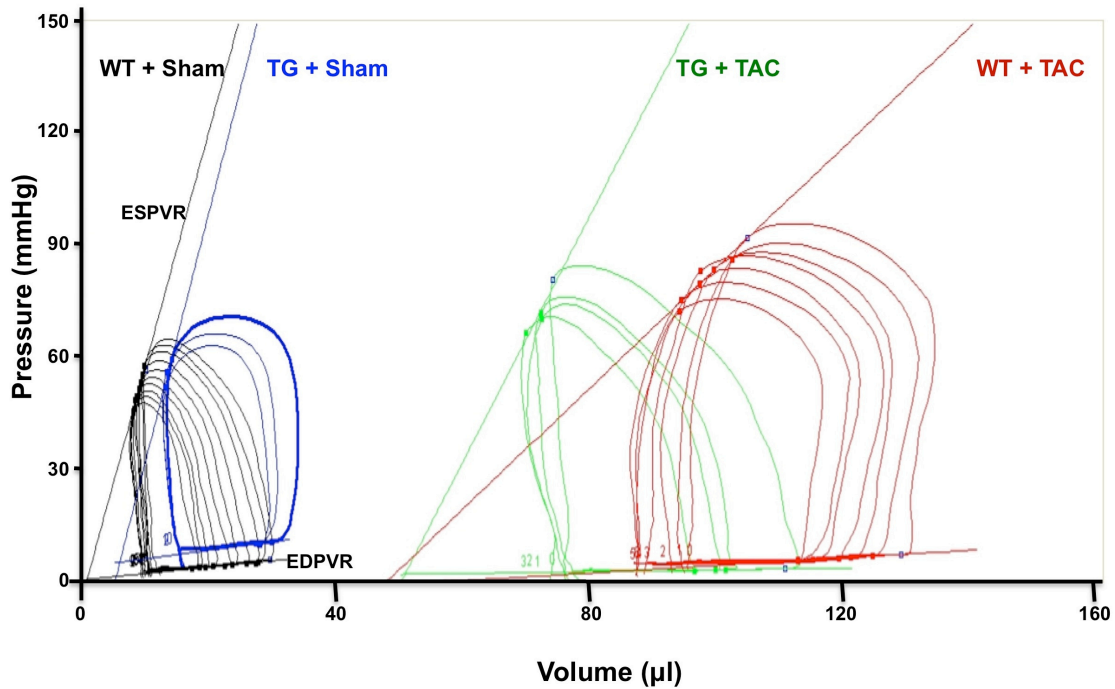

**Supplementary Figure 7. Hemodynamic analyses of SUMO1 transgenic mice both in sham and TAC operation groups.** Systolic and diastolic function was determined in SUMO1 transgenic mice by pressure-volume analysis. At 3 month of TAC, the loops shifted rightward. The end-systolic pressure-volume relationship (ESPVR) in the LV was slightly steeper in TG animals than in WT, suggesting increased cardiac contractility. By contrast, the slope of the LV end-diastolic pressure-volume relationship (EDPVR) was decreased in TG mice, indicating a decreased end-diastolic LV chamber stiffness. WT [wild type littermate]-sham: black; TG [SUMO1 transgenic mice]-sham: blue; WT-TAC: red; TG-TAC, green.

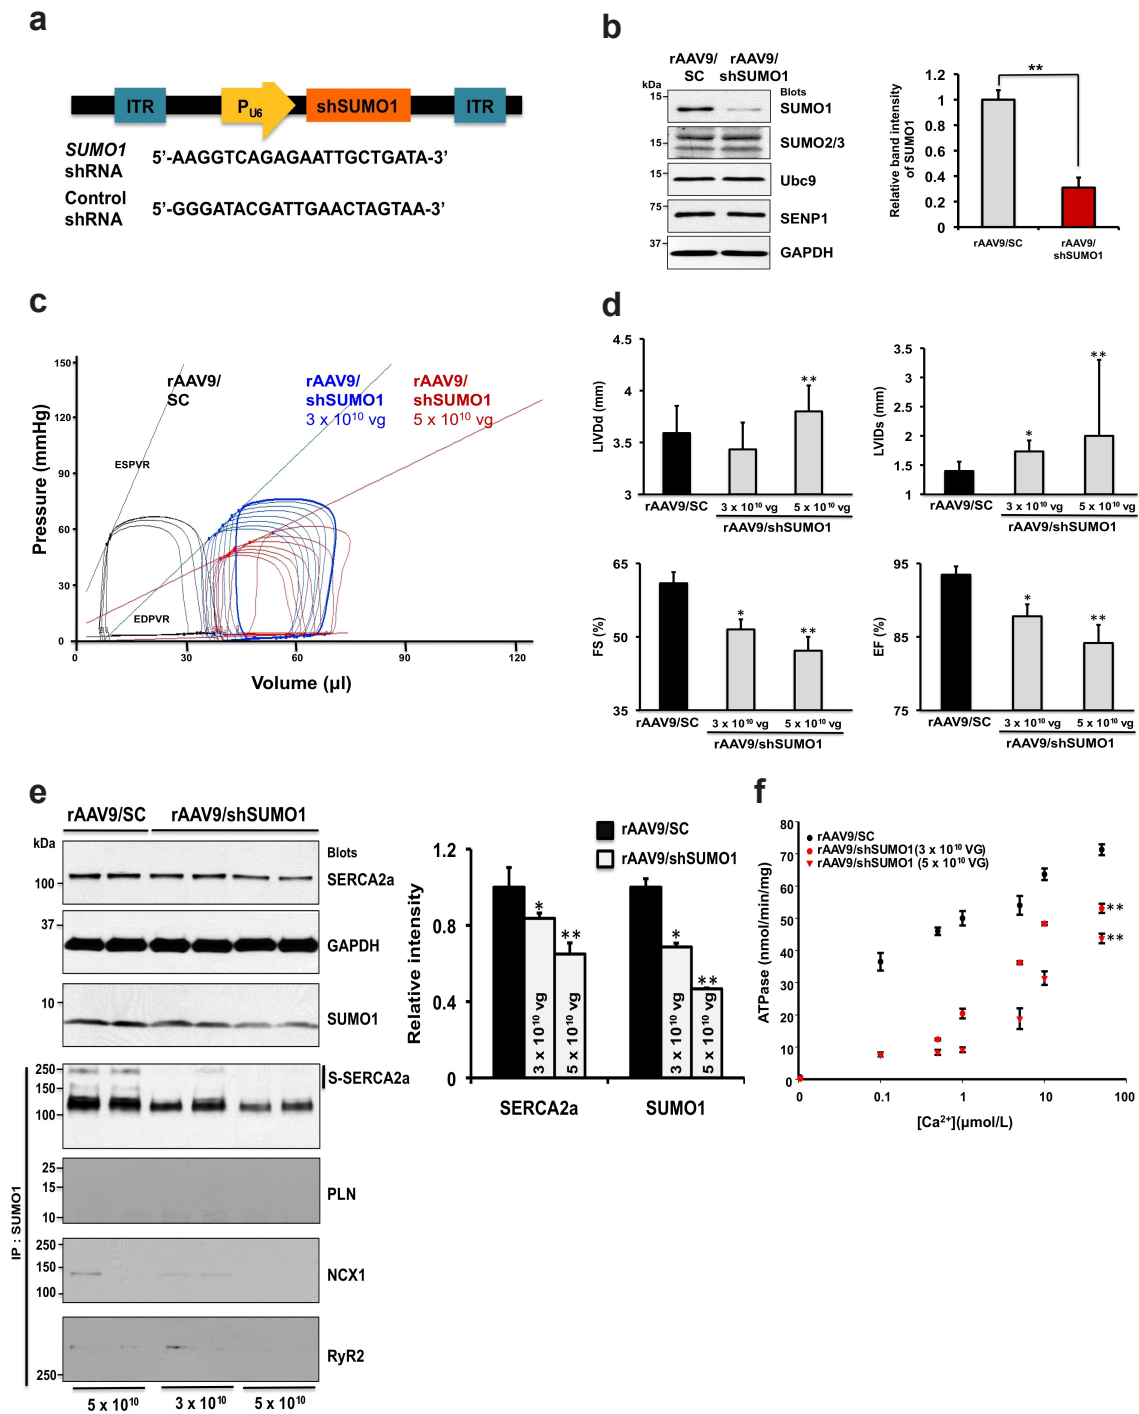

### Supplementary Figure 8. Dose-dependent effects of rAAV vectors containing shRNA against *SUMO1*.

(a) SUMO1 shRNA construct design. A recombinant AAV was designed to express a SUMO1 shRNA under control of the U6 promoter. As a control, a scramble expression cassette was cloned into the same viral vectors.

**(b)** Representative immunoblot analysis of cardiac tissue extracts from mice infected with rAAV9 expressing scrambled control shRNA (rAAV9/SC) or shRNA against *SUMO1* (rAAV9/shSUMO1) 3 weeks after injection (left panel). Total extracts were probed with the indicated antibodies, and the level of inhibition of cardiac SUMO1 expression was measured ( $5 \times 10^{10}$  vg/mice per each group,  $n=5$  per each group, right panel).

**(c)** Representative pressure-volume loops from a rAAV9/shSC and rAAV9/shSUMO1 injected mice. Pressure-volume loops are measured before and during transient inferior vena cava occlusion. SUMO1 down-regulation by rAAV9/shSUMO1 injection induced a rightward shift and decreased the slope of the linear fit line of the ESPVR. More severe effects were occurred when we injected an increased dose of rAAV9/shSUMO1.

**(d)** Quantitative analysis of echocardiographic assessments including internal diameters in end-diastole (LVIDd), end-systole (LVIDs), fractional shortening (FS), and ejection fraction (EF). rAAV9/shSC ( $5 \times 10^{10}$  vg/mice,  $n=14$ ); lower dose of rAAV9/shSUMO1 ( $3 \times 10^{10}$  vg/mice,  $n=14$ ); higher dose of rAAV9/shSUMO1 ( $5 \times 10^{10}$  vg/mice,  $n=12$ ).

**(e)** SUMOylation of SERCA2a. Cardiac tissues were immunoprecipitated with anti-SUMO1 antibody. SUMOylated forms of SERCA2a were detected by immunoblot analysis using an anti-SERCA2a antibody. Representative immunoblots and protein quantification results are shown ( $n=6$  per each group).

**(f)** ATPase activity of SERCA2a.  $\text{Ca}^{2+}$ -dependence of SERCA2a's ATPase activity is measured in preparations from scramble injected ( $\bullet$ ) and shRNA against SUMO1 injected hearts with  $3 \times 10^{10}$  vg/mice ( $\circ$ ) and  $5 \times 10^{10}$  vg/mice ( $\blacktriangledown$ ) ( $n=3$  per each group).

All data represent means  $\pm$  SD. \*  $p < 0.05$ ; \*\*  $p < 0.001$  vs. respective control using Student *t*-test.

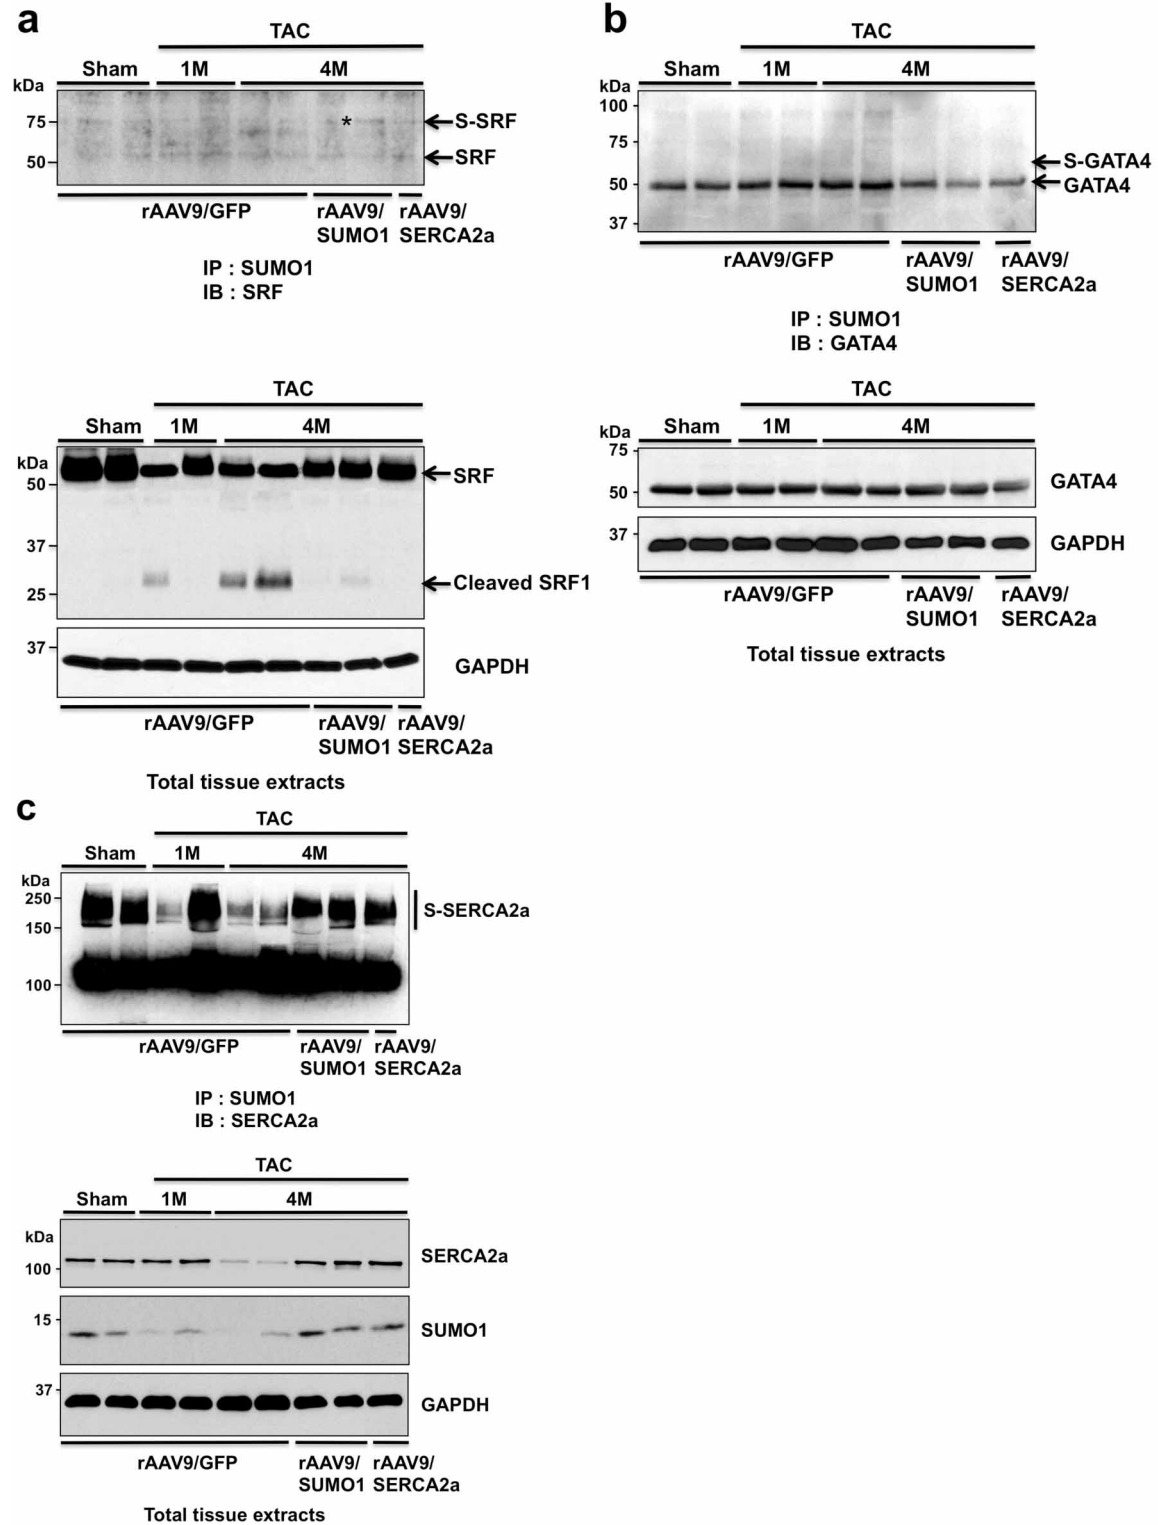

**Supplementry Figure 9.** Effects of AAV-mediated SUMO1 gene delivery on SUMOylations of known cardiac transcriptional factors such as SRF (a), GATA4 (b), and SERCA2a (c). Cardiac tissues were immunoprecipitated with anti-SUMO1 agarose.

SUMOylated forms of SRF, GATA4, and SERCA2a were detected by immunoblotting using its primary antibodies.

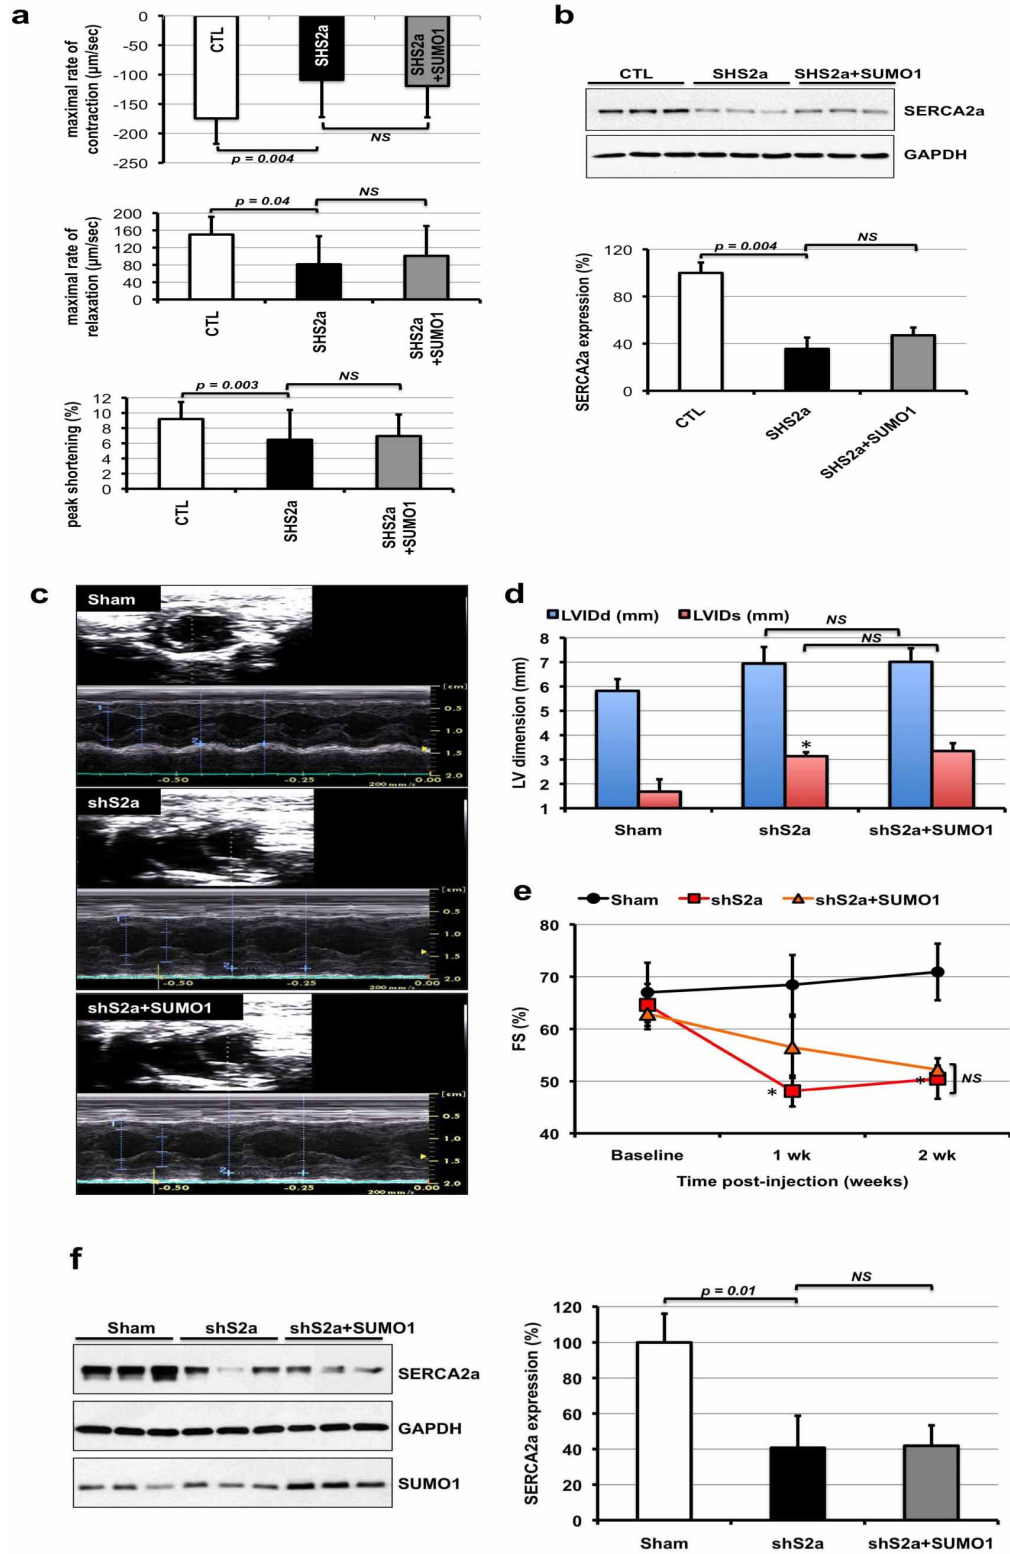

Supplementary Figure 10. shRNA-mediated loss of SERCA2a impairs rodent cardiac function.



- (a) Contractile properties of isolated rat cardiomyocytes. Maximal rate of contraction, relaxation and cell shortening were measured by IonOptix system. Values are means  $\pm$  SD;  $n = 20$  cells per group.
- (b) Immunoblotting for SERCA2a was performed with total lysates from the isolated rat cardiomyocytes at 5 days after viral infection. Lower right hand panel shows quantification of SERCA2a in the three different groups of cells.
- (c) Representative M-mode echocardiography showing dilated left ventricle end diastole and systole in SERCA2a shRNA injected hearts, without or with SUMO1 overexpression compared with sham control.
- (d) Evaluation of cardiac parameters: LVIDd in mm and LVIDs in mm ( $n=3$  rats per each group).
- (e) Fractional shortening measured at two different time points.
- (f) Immunoblots of SERCA2a expression. Values are mean  $\pm$  SD; \*  $p < 0.05$  versus sham control; NS, no significant.

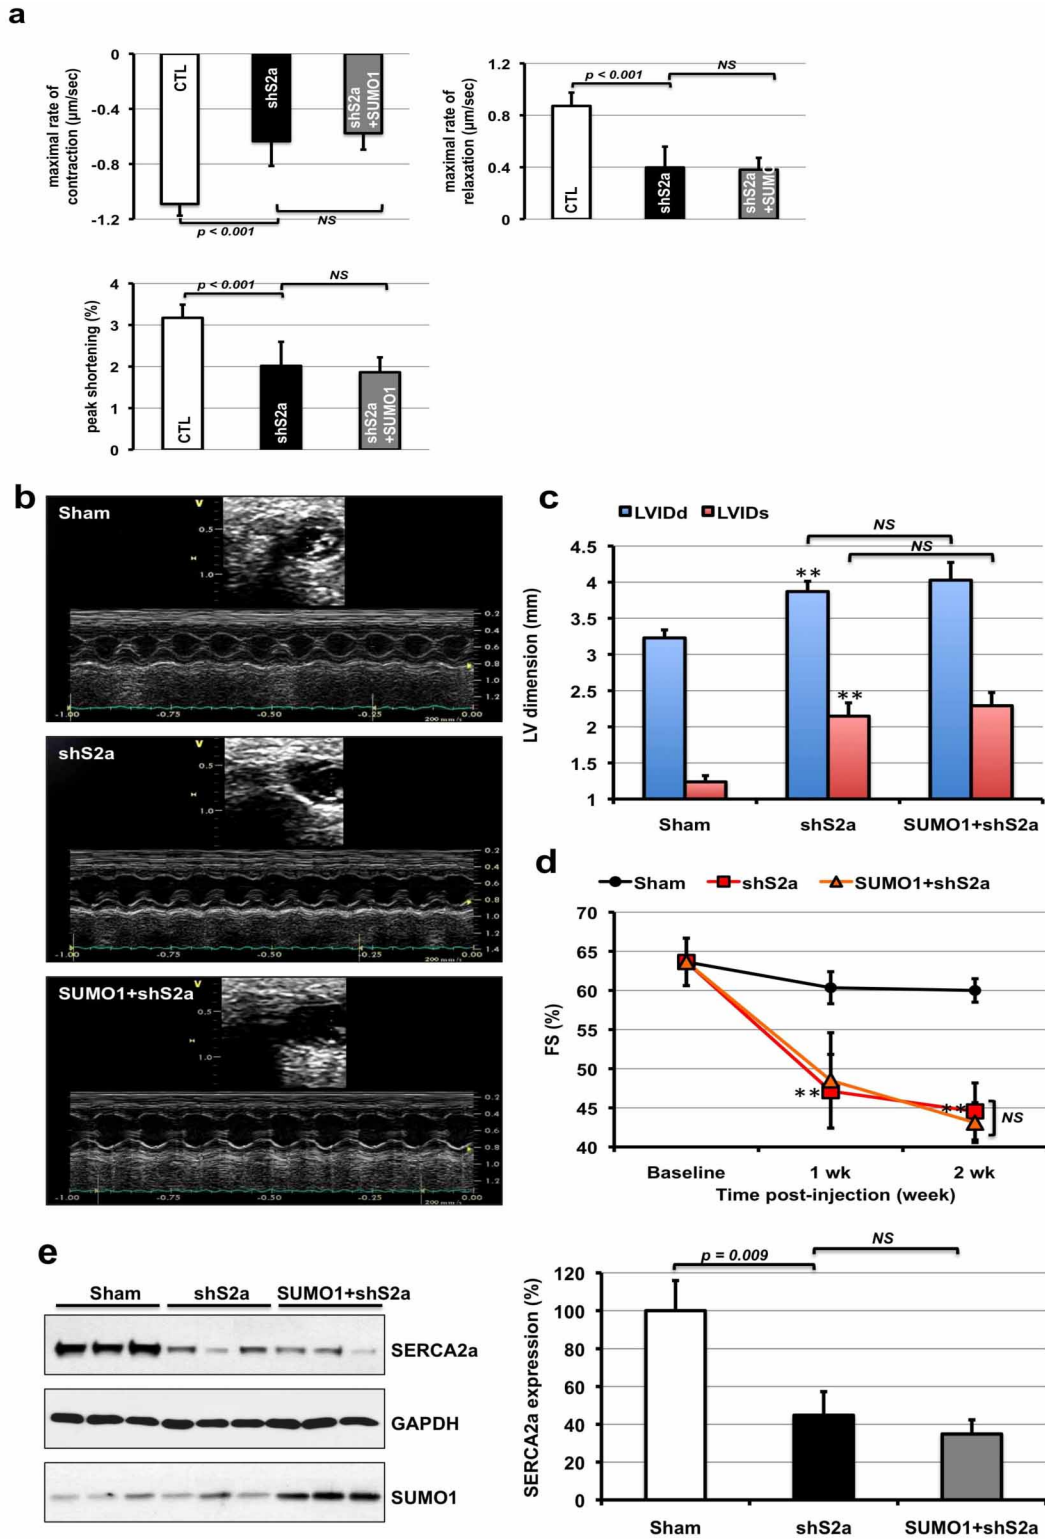

Supplementary Figure 11. shRNA-mediated loss of SERCA2a impairs murine cardiac function.

- (a) Contractile properties of isolated mouse cardiomyocytes. Maximal rate of contraction, relaxation and cell shortening were measured by IonOptix system. Values are means  $\pm$  SD;  $n = 20$  cells per group.
- (b) Representative M-mode echocardiography showing dilated left ventricle at end-diastole and end-systole in SERCA2a shRNA injected heart, without or with SUMO1 overexpression in comparison with sham control at 2 weeks after SERCA2a shRNA injection.
- (c) Evaluation of cardiac function in six SERCA2a shRNA injected mice, four SERCA2a shRNA with SUMO1 co-injected mice and six age-matched sham control mice, showing left ventricular dimensions such as LVIDd in mm and LVIDs in mm.
- (d) Fractional shortening measured at two different time points.
- (e) Immunoblots of SERCA2a expression. Values are mean  $\pm$  SD; \*\*  $p < 0.001$  versus sham control; NS, no significant.

**Supplementary Table 1. Echocardiographic parameters for SUMO1 gene transfer mice.** Data represent the mean value  $\pm$  SD of cardiac functional parameters after 4 month TAC operation. LVIDd, left ventricular internal dimension-diastole; LVIDs, left ventricular internal dimension-systole; FS, fractional shortening; EF, ejection fraction; HR, heart rate. \*  $p < 0.05$ ; \*\*  $p < 0.001$  vs. rAAV9/GFP in TAC.

|                   | <b>Sham</b>                | <b>TAC</b>                 |                              |                                |
|-------------------|----------------------------|----------------------------|------------------------------|--------------------------------|
|                   | <b>rAAV9/GFP</b><br>(n=12) | <b>rAAV9/GFP</b><br>(n=10) | <b>rAAV9/SUMO1</b><br>(n=14) | <b>rAAV9/SERCA2a</b><br>(n=12) |
| <b>LVIDd (mm)</b> | 3.40 $\pm$ 0.10            | 5.13 $\pm$ 0.57            | 3.33 $\pm$ 0.38*             | 3.46 $\pm$ 0.58**              |
| <b>LVIDs (mm)</b> | 1.50 $\pm$ 0.30            | 4.08 $\pm$ 0.71            | 1.55 $\pm$ 0.31**            | 1.53 $\pm$ 0.30**              |
| <b>FS (%)</b>     | 55.13 $\pm$ 1.50           | 21.11 $\pm$ 1.71           | 53.50 $\pm$ 5.03**           | 55.42 $\pm$ 2.05**             |
| <b>EF (%)</b>     | 90.28 $\pm$ 1.02           | 48.50 $\pm$ 9.74           | 88.94 $\pm$ 3.70**           | 90.44 $\pm$ 1.35**             |
| <b>HR (BPM)</b>   | 618.18 $\pm$ 41.70         | 589.16 $\pm$ 40.33         | 658.51 $\pm$ 32.35           | 629.34 $\pm$ 48.36             |

**Supplementary Table 2. Hemodynamic parameters for SUMO1 gene transfer mice.**

All values represent mean  $\pm$  SD. ESPVR slope; relationship between end-systolic pressure and volume; EDPVR slope; end-diastolic pressure-volume relationship; Pmax, maximum pressure point, Pmin, minimum pressure point, Pmax, maximum dP/dt; Pmin, minimum dP/dt; EDV, left ventricular end-diastolic volume; ESV, left ventricular end-systolic volume; SV, stroke volume; HR, heart rate (beats/min). Heart weight (HW) to Body weight (BW) ratio in mice was measured. \*  $p < 0.05$  vs. rAAV9/GFP in TAC.

|                                                 | Sham                      | TAC                       |                           |                          |
|-------------------------------------------------|---------------------------|---------------------------|---------------------------|--------------------------|
|                                                 | rAAV9/GFP<br>(n=3)        | rAAV9/GFP<br>(n=3)        | rAAV9/SUMO1<br>(n=3)      | rAAV9/SERCA2<br>a (n=3)  |
| <b>ESPVR slope<br/>(mmHg/<math>\mu</math>l)</b> | 4.48 $\pm$ 0.63           | 1.15 $\pm$ 0.58           | 4.33 $\pm$ 0.90*          | 4.56 $\pm$ 0.68*         |
| <b>EDPVR slope<br/>(mmHg/<math>\mu</math>l)</b> | 0.03 $\pm$ 0.02           | 0.05 $\pm$ 0.02           | 0.05 $\pm$ 0.02           | 0.05 $\pm$ 0.02          |
| <b>Pmax<br/>(mmHg)</b>                          | 69.50 $\pm$ 2.51          | 102.50 $\pm$ 46.66        | 100.11 $\pm$ 31.22        | 115.66 $\pm$ 20.20       |
| <b>Pmin (mmHg)</b>                              | 4.00 $\pm$ 1.41           | 13.50 $\pm$ 1.41          | 8.27 $\pm$ 6.72           | 17.70 $\pm$ 5.33*        |
| <b>dPmax</b>                                    | 4195.75 $\pm$<br>2526.84  | 5761.83 $\pm$<br>2439.28  | 4912.50 $\pm$<br>1183.56  | 5560.48 $\pm$<br>161.82  |
| <b>dPmin</b>                                    | -3825.25 $\pm$<br>2807.56 | -4995.83<br>$\pm$ 1849.55 | -4240.00 $\pm$<br>1331.69 | -4729.75 $\pm$<br>529.59 |
| <b>EDV (<math>\mu</math>l)</b>                  | 58.75 $\pm$ 10.96         | 124.00 $\pm$ 6.36         | 54.24 $\pm$ 12.12*        | 50.80 $\pm$ 22.09*       |
| <b>ESV (<math>\mu</math>l)</b>                  | 20.91 $\pm$ 9.31          | 98.25 $\pm$ 26.51         | 21.91 $\pm$ 12.93*        | 27.94 $\pm$ 12.53*       |
| <b>SV (<math>\mu</math>l)</b>                   | 39.00 $\pm$ 2.82          | 42.50 $\pm$ 16.97         | 37.76 $\pm$ 1.74*         | 37.33 $\pm$ 9.01*        |
| <b>HR (bpm)</b>                                 | 522.50 $\pm$<br>40.30     | 440.25 $\pm$ 20.15        | 528.12 $\pm$ 33.44        | 567.71 $\pm$ 76.17       |
| <b>HW/BW<br/>(mg/g) (n=10)</b>                  | 3.97 $\pm$ 0.24           | 8.57 $\pm$ 2.77           | 4.15 $\pm$ 0.66*          | 4.15 $\pm$ 1.24*         |

**Supplementary Table 3. Echocardiographic parameters for SUMO1 transgenic mice with or without tamoxifen administration.** Data represent the mean value  $\pm$  SD of cardiac functional parameters after 1 month of tamoxifen treatment. WT, wild type littermate; TG, SUMO1 transgenic mice; TAM, tamoxifen; LVIDd, left ventricular internal dimension-diastole; LVIDs, left ventricular internal dimension-systole; FS, fractional shortening; EF, ejection fraction; HR, heart rate.

|                   | WT                 |                    | TG                 |                    |
|-------------------|--------------------|--------------------|--------------------|--------------------|
|                   | TAM (-)<br>(n=3)   | TAM (+)<br>(n=3)   | TAM (-)<br>(n=3)   | TAM (+)<br>(n=3)   |
| <b>LVIDd (mm)</b> | 3.26 $\pm$ 0.11    | 3.13 $\pm$ 0.05    | 3.33 $\pm$ 0.11    | 2.90 $\pm$ 0.34    |
| <b>LIVDs (mm)</b> | 1.26 $\pm$ 0.05    | 1.30 $\pm$ 0.20    | 1.30 $\pm$ 0.10    | 1.02 $\pm$ 0.22    |
| <b>FS (%)</b>     | 61.46 $\pm$ 1.46   | 58.87 $\pm$ 5.00   | 61.40 $\pm$ 1.55   | 65.5 $\pm$ 3.74    |
| <b>EF (%)</b>     | 93.80 $\pm$ 0.69   | 92.32 $\pm$ 2.79   | 93.76 $\pm$ 0.74   | 95.46 $\pm$ 1.44   |
| <b>HR (BPM)</b>   | 630.43 $\pm$ 44.48 | 601.69 $\pm$ 22.35 | 562.45 $\pm$ 48.66 | 521.28 $\pm$ 35.65 |

**Supplementary Table 4. Echocardiographic parameters for SUMO1 transgenic mice after TAM-induced SUMO1 overexpression at 3 month post-TAC.** Data represent the mean value  $\pm$  SD of cardiac functional parameters. WT, wild type littermate; TG, SUMO1 transgenic mice; TAM, tamoxifen; LVIDd, left ventricular internal dimension-diastole; LIVDs, left ventricular internal dimension-systole; FS, fractional shortening; EF, ejection fraction; HR, heart rate. \*\*  $p < 0.001$  vs. WT in TAC.

|                   | <b>2M post-TAC</b>           |                              | <b>3M post-TAC (+TAM)</b>    |                              |
|-------------------|------------------------------|------------------------------|------------------------------|------------------------------|
|                   | <b>WT</b><br>( <i>n</i> =12) | <b>TG</b><br>( <i>n</i> =10) | <b>WT</b><br>( <i>n</i> =14) | <b>TG</b><br>( <i>n</i> =12) |
| <b>LVIDd (mm)</b> | 4.20 $\pm$ 0.56              | 3.76 $\pm$ 0.47              | 4.40 $\pm$ 0.57              | 3.24 $\pm$ 0.33**            |
| <b>LIVDs (mm)</b> | 2.60 $\pm$ 0.70              | 2.33 $\pm$ 0.61              | 2.93 $\pm$ 0.54              | 1.44 $\pm$ 0.30**            |
| <b>FS (%)</b>     | 41.23 $\pm$ 7.35             | 37.40 $\pm$ 8.54             | 34.30 $\pm$ 5.56             | 55.91 $\pm$ 6.70**           |
| <b>EF (%)</b>     | 77.84 $\pm$ 8.06             | 73.27 $\pm$ 1.53             | 69.57 $\pm$ 7.28             | 90.26 $\pm$ 4.27**           |
| <b>HR (BPM)</b>   | 620.14 $\pm$ 30.65           | 593.60 $\pm$ 65.17           | 620.72 $\pm$ 42.60           | 550.18 $\pm$ 68.48           |

**Supplementary Table 5. Hemodynamic parameters based on *in vivo* pressure-volume relationships for SUMO1 transgenic mice.** All values represent mean  $\pm$  SD. ESPVR slope; relationship between end-systolic pressure and volume; EDPVR slope; end-diastolic pressure-volume relationship; Pmax, maximum pressure point, Pmin, minimum pressure point, Pmax, maximum dP/dt; Pmin, minimum dP/dt; EDV, left ventricular end-diastolic volume; ESV, left ventricular end-systolic volume; SV, stroke volume; HR, heart rate (beats/min). Heart weight (HW) to Body weight (BW) ratio in mice was measured. \*  $p < 0.05$  vs. WT in TAC.

|                                                 | Sham                     |                          | TAC                      |                          |
|-------------------------------------------------|--------------------------|--------------------------|--------------------------|--------------------------|
|                                                 | WT<br>(n=5)              | TG<br>(n=5)              | WT<br>(n=5)              | TG<br>(n=3)              |
| <b>ESPVR slope<br/>(mmHg/<math>\mu</math>l)</b> | 4.42 $\pm$ 1.07          | 6.12 $\pm$ 1.74          | 2.56 $\pm$ 0.71          | 4.33 $\pm$ 1.49*         |
| <b>EDPVR slope<br/>(mmHg/<math>\mu</math>l)</b> | 0.07 $\pm$ 0.05          | 0.12 $\pm$ 0.07          | 0.08 $\pm$ 0.04          | 0.03 $\pm$ 0.01          |
| <b>Pmax (mmHg)</b>                              | 56.37 $\pm$ 3.90         | 65.3 $\pm$ 9.68          | 98.90 $\pm$ 15.06        | 102.66 $\pm$ 8.95*       |
| <b>Pmin (mmHg)</b>                              | 3.89 $\pm$ 1.93          | 6.50 $\pm$ 2.01          | 4.30 $\pm$ 3.30          | 12.30 $\pm$ 1.50         |
| <b>dPmax</b>                                    | 2708.73 $\pm$<br>765.78  | 3730.10 $\pm$<br>920.805 | 3751.80 $\pm$<br>741.41  | 4745.33 $\pm$<br>475.31  |
| <b>dPmin</b>                                    | -2035.03 $\pm$<br>749.19 | -3004.20 $\pm$<br>918.61 | -3535.80 $\pm$<br>718.18 | -2853.50 $\pm$<br>351.98 |
| <b>EDV (<math>\mu</math>l)</b>                  | 50.08 $\pm$ 4.17         | 53.40 $\pm$ 14.34        | 120.90 $\pm$ 13.35       | 62.09 $\pm$ 22.76        |
| <b>ESV (<math>\mu</math>l)</b>                  | 27.89 $\pm$ 6.44         | 27.10 $\pm$ 9.94         | 85.40 $\pm$ 23.27        | 37.45 $\pm$ 26.87        |
| <b>SV (<math>\mu</math>l)</b>                   | 27.71 $\pm$ 6.97         | 33.60 $\pm$ 12.13        | 46.10 $\pm$ 11.40        | 26.90 $\pm$ 9.33*        |
| <b>HR (bpm)</b>                                 | 437.34 $\pm$ 97.16       | 448.90 $\pm$ 72.55       | 441.00 $\pm$ 70.59       | 384.90 $\pm$ 38.66       |
| <b>HW/BW<br/>(mg/g) (n=10)</b>                  | 4.61 $\pm$ 0.45          | 4.20 $\pm$ 0.99          | 8.89 $\pm$ 0.36          | 7.34 $\pm$ 0.13*         |



**Supplementary Table 6. Echocardiographic parameters for AAV9-mediated cardiac SUMO1 silencing mice.** All values represent mean  $\pm$  SD. LVIDd, left ventricular internal dimension-diastole; LVIDs, left ventricular internal dimension-systole; FS, fractional shortening; EF, ejection fraction; HR, heart rate. \*\*  $p < 0.001$  vs. rAAV9/SC.

|                   | <b>rAAV9/SC</b>    | <b>rAAV9/shSUMO1</b>  |
|-------------------|--------------------|-----------------------|
|                   | $5 \times 10^{10}$ | $5 \times 10^{10}$    |
|                   | (n=14)             | (n=14)                |
| <b>LVIDd (mm)</b> | $1.30 \pm 0.12$    | $2.02 \pm 0.17^{**}$  |
| <b>LVIDs (mm)</b> | $3.42 \pm 0.19$    | $3.85 \pm 0.17^{**}$  |
| <b>FS (%)</b>     | $61.77 \pm 4.77$   | $47.63 \pm 3.07^{**}$ |
| <b>EF (%)</b>     | $93.85 \pm 1.23$   | $84.51 \pm 2.63^{**}$ |
| <b>HR (BPM)</b>   | $569.88 \pm 71.35$ | $639.61 \pm 50.38$    |

**Supplementary Table 7. Hemodynamic parameters for AAV9-mediated cardiac SUMO1 silencing mice.** Summary of hemodynamic parameters in each group, measured using Scisense pressure–volume catheter. The data are expressed as mean values  $\pm$  S.D. ESPVR slope; relationship between end-systolic pressure and volume; EDPVR slope; end-diastolic pressure-volume relationship; Pmax, maximum pressure point, Pmin, minimum pressure point, Pmax, maximum dP/dt; Pmin, minimum dP/dt; EDV, left ventricular end-diastolic volume; ESV, left ventricular end-systolic volume; CO, cardiac output; Ea, arterial elastance; HR, heart rate (beats/min). Heart weight (HW) to Body weight (BW) ratio in mice was measured. \*  $p < 0.05$ ; \*\*  $p < 0.001$  vs. rAAV9/SC control group.

|                                             | rAAV9/SC              | rAAV9/shSUMO1           |
|---------------------------------------------|-----------------------|-------------------------|
|                                             | 5 x 10 <sup>10</sup>  | 5 x 10 <sup>10</sup>    |
|                                             | (n=7)                 | (n=8)                   |
| <b>ESPVR slope (mmHg/<math>\mu</math>l)</b> | 4.57 $\pm$ 0.74       | 0.96 $\pm$ 0.76**       |
| <b>EDPVR slope (mmHg/<math>\mu</math>l)</b> | 0.06 $\pm$ 0.05       | 0.06 $\pm$ 0.02         |
| <b>Pmax (mmHg)</b>                          | 73.22 $\pm$ 10.22     | 54.00 $\pm$ 9.53*       |
| <b>Pmin (mmHg)</b>                          | 7.55 $\pm$ 3.20       | 4.33 $\pm$ 2.08         |
| <b>dPmax (mmHg)</b>                         | 3797.02 $\pm$ 469.32  | 2554.6667 $\pm$ 471.28* |
| <b>dPmin (mmHg)</b>                         | -3264.56 $\pm$ 633.37 | -2093.67 $\pm$ 553.37   |
| <b>EDV (<math>\mu</math>l)</b>              | 48.36 $\pm$ 4.81      | 47.33 $\pm$ 2.51        |
| <b>ESV (<math>\mu</math>l)</b>              | 24.33 $\pm$ 9.01      | 18.83 $\pm$ 9.46        |
| <b>SV (<math>\mu</math>l)</b>               | 29.13 $\pm$ 2.23      | 30.66 $\pm$ 4.16        |
| <b>HR (bpm)</b>                             | 523.91 $\pm$ 101.88   | 492.00 $\pm$ 42.33      |
| <b>HW/BW (mg/g) (n=7)</b>                   | 4.19 $\pm$ 0.01       | 4.80 $\pm$ 0.10*        |

**Supplementary Table 8. Echocardiographic parameters for shRNA-mediated SERCA2a silencing rat.** Summary of cardiac function in lentiviral SERCA2a shRNA injected rats, with either adenoviral  $\beta$ -gal (shS2a) or adenoviral SUMO1 (shS2a+SUMO1). Age-matched sham-operated rat served as controls (n=3 per group). The data are expressed as mean values  $\pm$  S.D. \* p < 0.05; \*\* p < 0.001 versus sham control.

|                   | <b>Sham</b><br>(n=3) | <b>shSERCA2a</b><br>(n=3) | <b>shSERCA2a</b><br><b>+ SUMO1</b><br>(n=3) |
|-------------------|----------------------|---------------------------|---------------------------------------------|
| <b>LVIDd (mm)</b> | 5.82 $\pm$ 0.48      | 6.94 $\pm$ 0.68           | 7.01 $\pm$ 0.55                             |
| <b>LVIDs (mm)</b> | 1.68 $\pm$ 0.50      | 3.13 $\pm$ 0.16*          | 3.35 $\pm$ 0.32*                            |
| <b>FS (%)</b>     | 70.91 $\pm$ 5.7      | 51.56 $\pm$ 3.89*         | 52.22 $\pm$ 0.79*                           |
| <b>EF (%)</b>     | 86.52 $\pm$ 0.45     | 67.31 $\pm$ 2.67**        | 67.99 $\pm$ 0.63**                          |
| <b>HR (BPM)</b>   | 400.33 $\pm$ 27.53   | 437.40 $\pm$ 20.14        | 447.25 $\pm$ 42.83                          |

**Supplementary Table 9. Echocardiographic parameters for shRNA-mediated SERCA2a silencing mice.** Evaluation of cardiac function in lentiviral SERCA2a shRNA injected mice, with either rAAV9/GFP (shS2a, n=6) or rAAV9/SUMO1 (SUMO1+shS2a, n=4). Age-matched sham-operated mice served as controls (n=4). The data are expressed as mean values  $\pm$  S.D. \*\*  $p < 0.001$  versus sham control.

|                   | <b>Sham</b><br>(n=4) | <b>shSERCA2a</b><br>(n=6) | <b>SUMO1</b><br><b>+shSERCA2a</b><br>(n=4) |
|-------------------|----------------------|---------------------------|--------------------------------------------|
| <b>LVIDd (mm)</b> | 3.22 $\pm$ 0.11      | 3.87 $\pm$ 0.14**         | 4.02 $\pm$ 0.24**                          |
| <b>LIVDs (mm)</b> | 1.23 $\pm$ 0.08      | 2.14 $\pm$ 0.18**         | 2.29 $\pm$ 0.18**                          |
| <b>FS (%)</b>     | 61.74 $\pm$ 1.53     | 44.54 $\pm$ 3.63**        | 43.11 $\pm$ 2.55**                         |
| <b>EF (%)</b>     | 93.94 $\pm$ 0.74     | 81.64 $\pm$ 3.62**        | 80.30 $\pm$ 2.66**                         |
| <b>HR (BPM)</b>   | 608.75 $\pm$ 26.57   | 640.80 $\pm$ 19.05        | 615.00 $\pm$ 41.18                         |
